# Supplementary material for: Cadherin 11 Inhibition Downregulates β-catenin, Deactivates the Canonical WNT Signalling Pathway and Suppresses the Cancer Stem Cell-Like Phenotype of Triple Negative Breast Cancer
Source: MDPI journal article supplement (doi:10.3390/jcm8020148), 2019-01-27
Supplement: s1 [file s1]

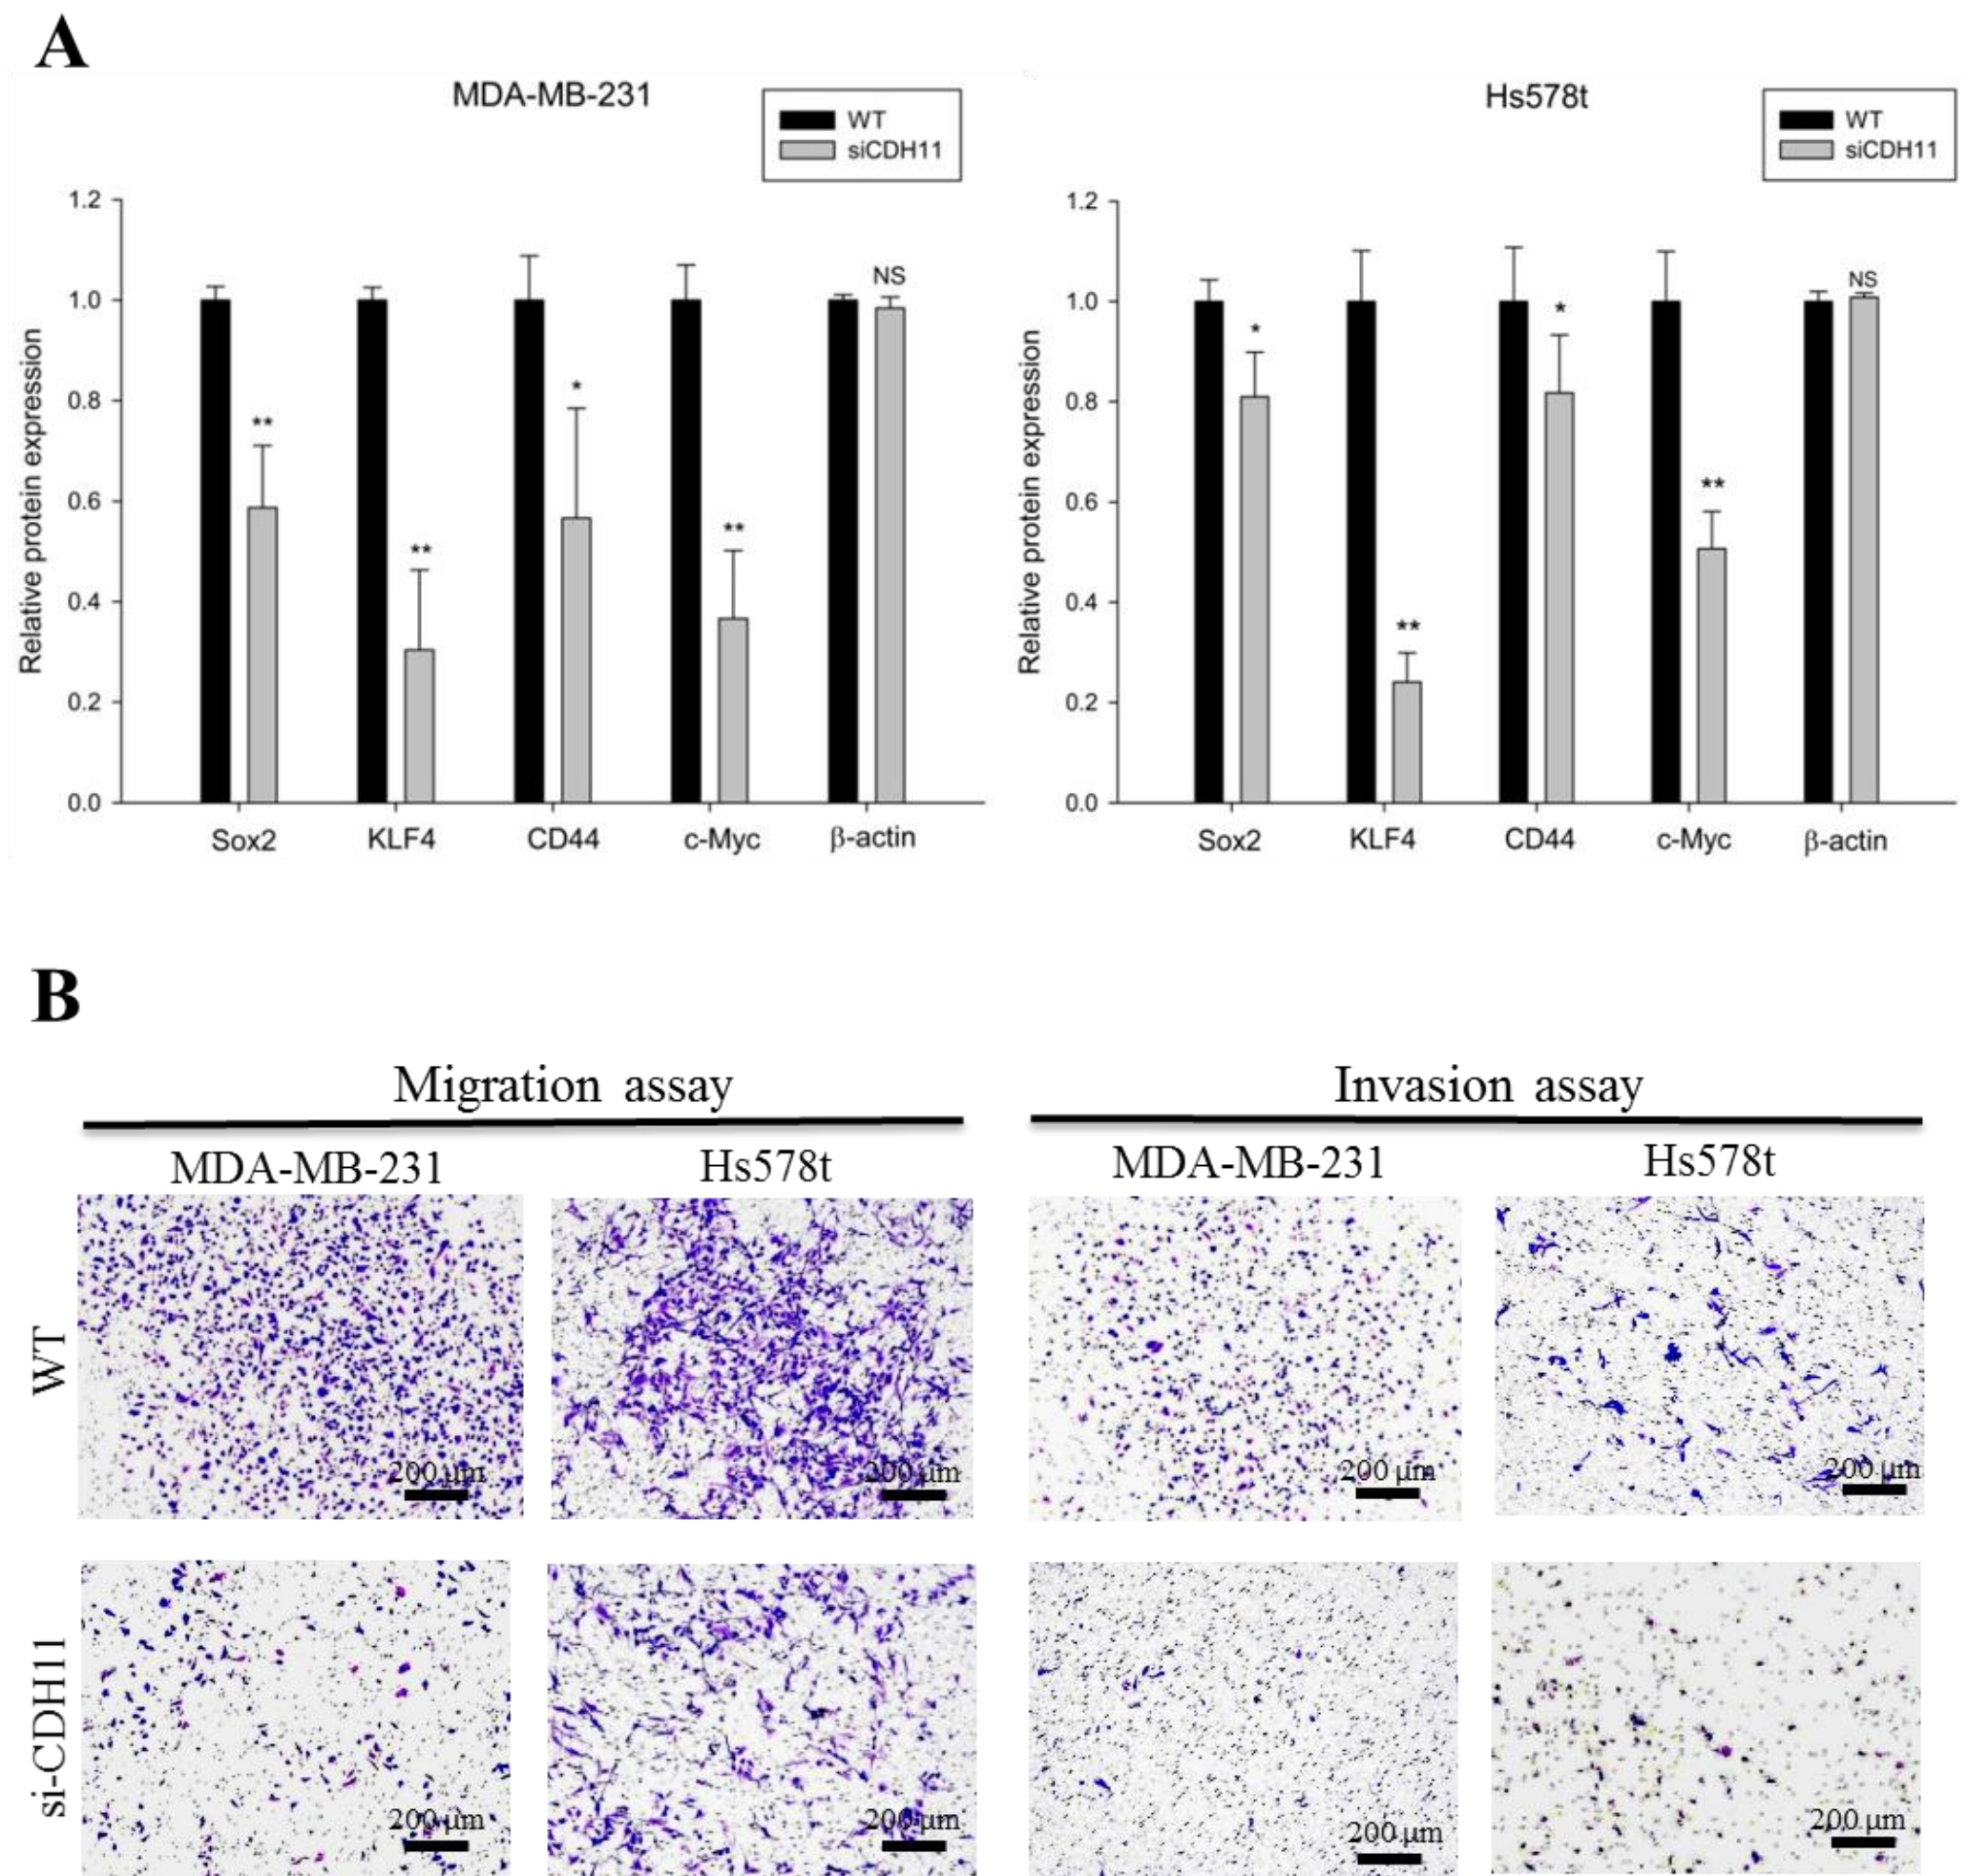

Supplementary Figure 1

Primary culture from  
tumor xenografted mice

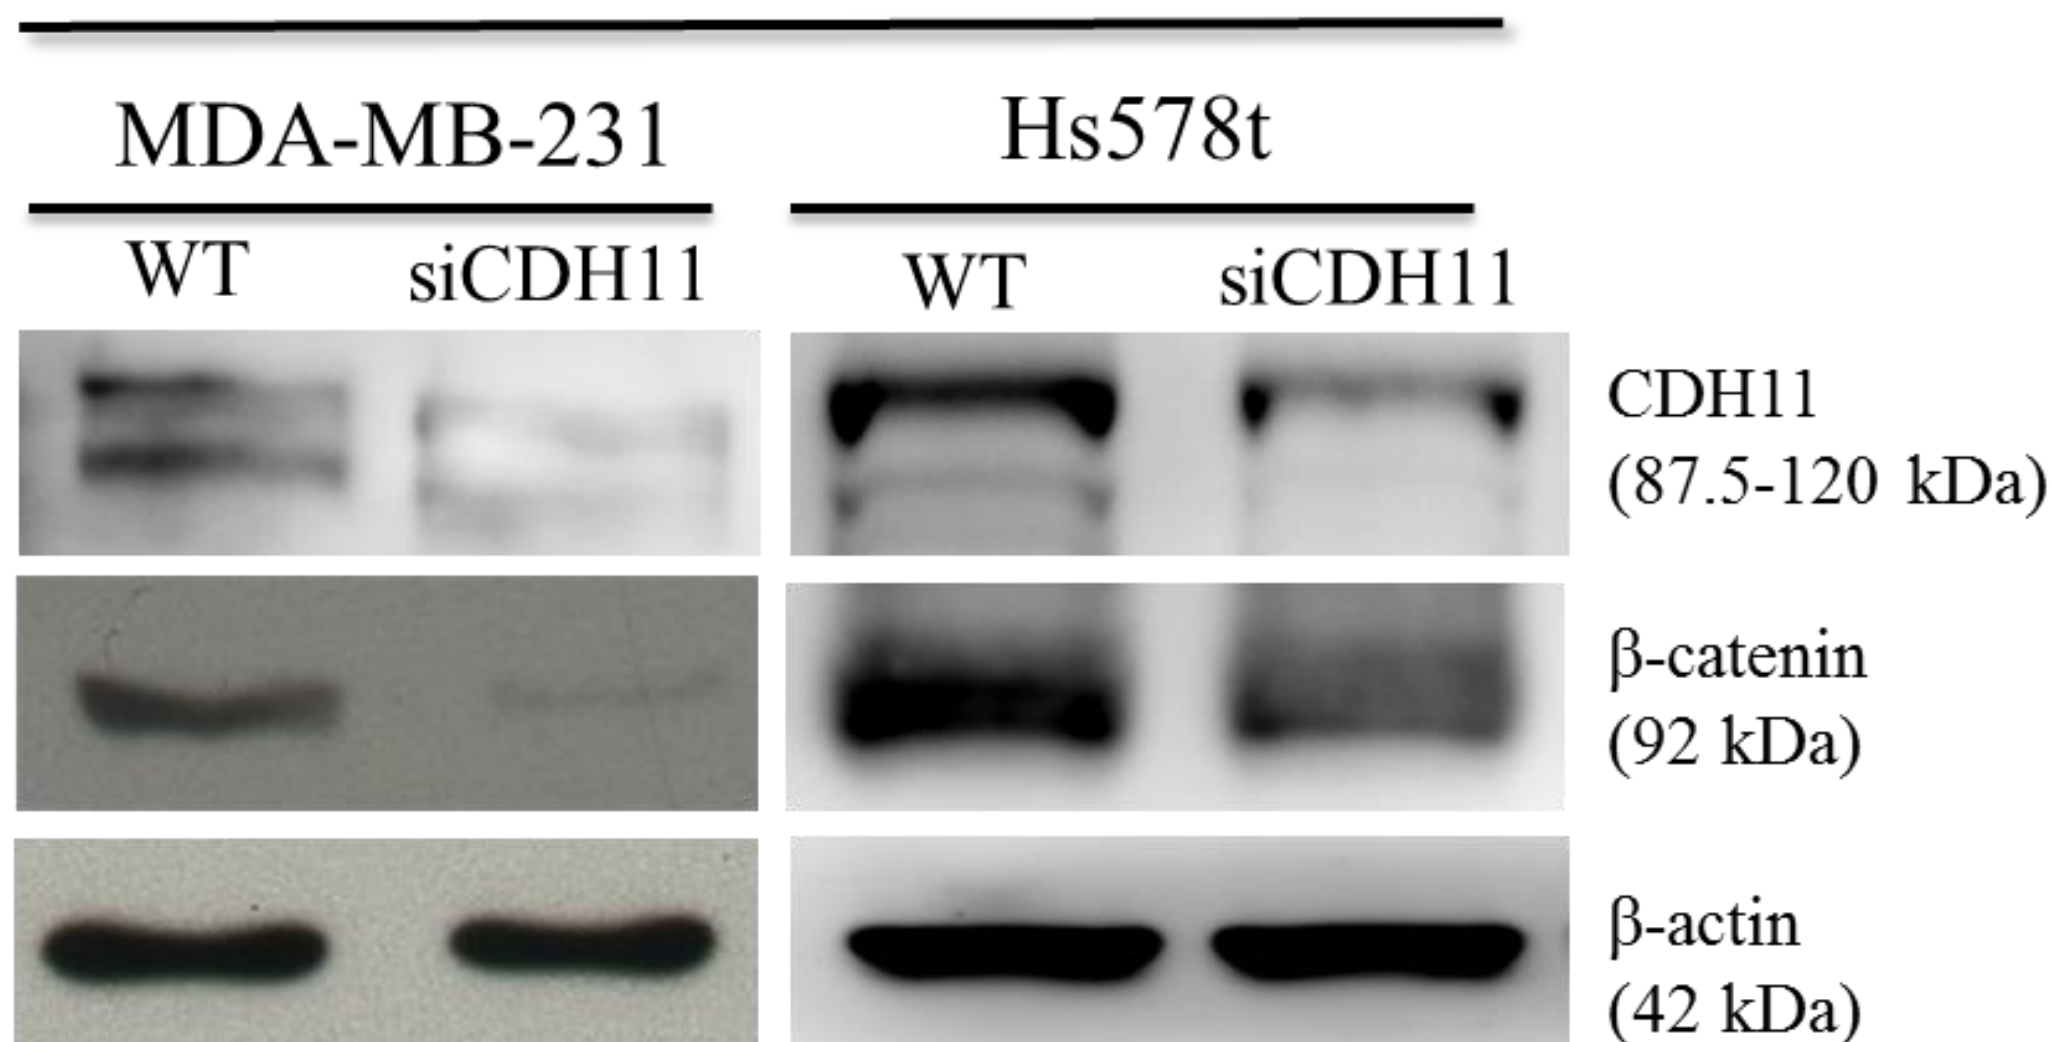

Supplementary Figure 2
